# Supplementary material for: Efficient Z-scheme charge separation in WO3/PbWO4 for the removal of organic pollutants
Source: Royal Society of Chemistry journal article supplement (doi:10.1039/d0nj04180g), 2020-01-01
Supplement: d0nj04180g1.pdf [file d0nj04180g1.pdf]

1 **Appendix A. Supplementary data**

2 **Table S1.** The short name of synthesized samples with different synthesis condition

| sample | condition                              |                                           |                       |                     | lable             |
|--------|----------------------------------------|-------------------------------------------|-----------------------|---------------------|-------------------|
|        | NaWO <sub>4</sub> ·H <sub>2</sub> O(g) | Pb(AC) <sub>2</sub> ·3H <sub>2</sub> O(g) | HNO <sub>3</sub> (ml) | Ethylene glycol(ml) |                   |
| 1      | 0.53                                   | 0                                         | 3                     | 1                   | WO <sub>3</sub>   |
| 2      | 0.53                                   | 0.0758                                    | 3                     | 1                   | WP-1              |
| 3      | 0.53                                   | 0.1516                                    | 3                     | 1                   | WP-2              |
| 4      | 0.53                                   | 0.2274                                    | 3                     | 1                   | WP-3              |
| 5      | 0.53                                   | 0.3032                                    | 3                     | 1                   | WP-4              |
| 6      | 0.53                                   | 0.3790                                    | 3                     | 1                   | WP-5              |
| 7      | 0.53                                   | 0.4548                                    | 3                     | 1                   | WP-6              |
| 8      | 0.53                                   | 0.62                                      | 3                     | 1                   | PbWO <sub>4</sub> |

3 **Table S2.** XPS data of PW, PWH-5, and W

|                         | <b>O 1s</b>          | <b>W 4f</b> | <b>Pb 4f</b> | <b>VB</b> | <b>O</b> | <b>W</b> | <b>Pb</b> |
|-------------------------|----------------------|-------------|--------------|-----------|----------|----------|-----------|
|                         | (eV)                 | (eV)        | (eV)         | (eV)      | (%)      | (%)      | (%)       |
| <b>WO<sub>3</sub></b>   | 529 <sup>[1]</sup> 7 | 34.7        | -            | 2.68      | 55.31    | 21.07    | -         |
|                         |                      | 36.8        |              |           |          |          |           |
| <b>WP-4</b>             | 529.7                | 34.7        | 138.1        | -         | 49.31    | 15.14    | 4.73      |
|                         |                      | 36.8        | 143.0        |           |          |          |           |
| <b>PbWO<sub>4</sub></b> | 529.6                | 34.4        | 137.6        | 1.66      | 35.36    | 9.16     | 8.96      |
|                         |                      | 36.5        | 142.4        |           |          |          |           |

4

5

**Table S3.** BET surface areas, pore volumes, and pore size of the samples

| Samples           | BET surface areas (m <sup>2</sup> g <sup>-1</sup> ) | Pore volume (cm <sup>3</sup> g <sup>-1</sup> ) | Pore size (nm) |
|-------------------|-----------------------------------------------------|------------------------------------------------|----------------|
| WO <sub>3</sub>   | 5.3826                                              | 0.022076                                       | 15.9904        |
| WP-1              | 37.5730                                             | 0.235167                                       | 25.0357        |
| WP-2              | 34.0102                                             | 0.185593                                       | 21.8279        |
| WP-3              | 9.4986                                              | 0.093349                                       | 39.3107        |
| WP-4              | 12.6849                                             | 0.087182                                       | 27.4916        |
| WP-5              | 1.8648                                              | 0.011727                                       | 25.1536        |
| WP-6              | 1.9938                                              | 0.026214                                       | 52.5989        |
| PbWO <sub>4</sub> | 1.8770                                              | 0.016863                                       | 35.9362        |

**Table S4.** The corresponding report of WO<sub>3</sub>, PbWO<sub>4</sub> and composite photocatalysts for RhB

7 degradation

| Photocatalysts                                      | RhB (mg/L) | Time (min) | Dosage      | Light Source                | Removal efficiency (%) | Refs.     |
|-----------------------------------------------------|------------|------------|-------------|-----------------------------|------------------------|-----------|
| WO <sub>3</sub> /Ag/Ag <sub>3</sub> PO <sub>4</sub> | 20         | 120        | 100ml/100mg | UV filter 500 W Xe-lamp     | 92%                    | [2]       |
| WO <sub>3</sub> /MoS <sub>2</sub>                   | 10         | 120        | 100ml/50mg  | 500 W tungsten halogen lamp | 98.2%                  | [3]       |
| WO <sub>3</sub>                                     | 4          | 150        | 100ml/30mg  | UV filter 300 W Xe-lamp     | 99%                    | [4]       |
| WO <sub>3</sub> /Bi <sub>2</sub> WO <sub>6</sub>    | 5          | 150        | 10ml/10mg   | UV filter 500 W Xe-lamp     | 78.1%                  | [5]       |
| PbWO <sub>4</sub> :9%Eu <sup>3+</sup>               | 5          | 240        | 50ml/50mg   | UV light 500 W mercury lamp | 90.85%                 | [6]       |
| PbWO <sub>4</sub>                                   | 2.4        | 105        | 50ml/50mg   | UV filter 500 W Xe-lamp     | 100%                   | [7]       |
| WP-4                                                | 5          | 30         | 100ml/50mg  | 300 W Xe lamp               | 98.6%                  | This work |

8

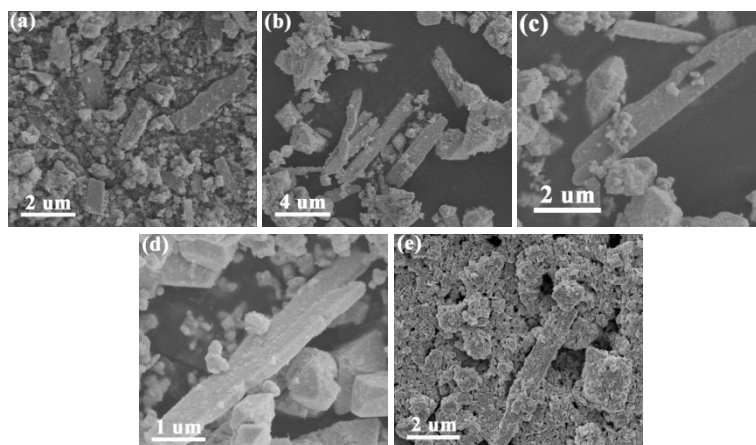

9

10 **Fig. S1** SEM images of WP-4 at various reaction stages (a) 1h, (b) 3h, (c) 5h, (d) 8h, (e) 12h.

11 It can be seen from the Fig.S1 that with the extension of reaction time, the rod structure material  
12 shows a growth process, from the initial 2-3 um to 5-6 um. The rod-shaped sample is lead tungstate (it  
13 has been proved in the paper), and the nanoparticles on the surface of  $\text{PbWO}_4$  are  $\text{WO}_3$ . In the process  
14 of reaction, the nanoparticle tungsten trioxide gradually compounds on the lead tungstate surface,  
15 forming a close contact phase interface.

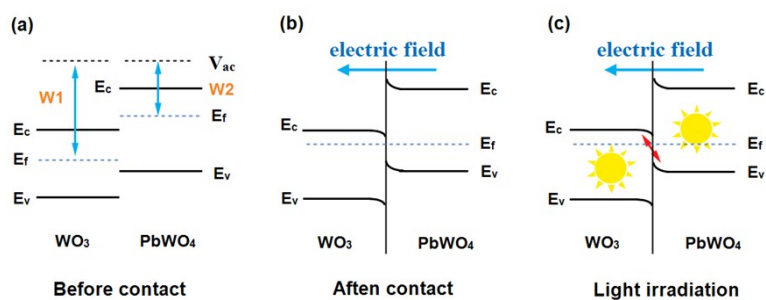

16

17 **Fig. S2.** (a) The band gap of  $\text{WO}_3$  and  $\text{PbWO}_4$ . (b) The internal electric field and band edge  
18 bending at the interface of  $\text{WO}_3/\text{PbWO}_4$ . (c) The Z-scheme charge transfer mechanism between  $\text{WO}_3$   
19 and  $\text{PbWO}_4$  under light irradiation

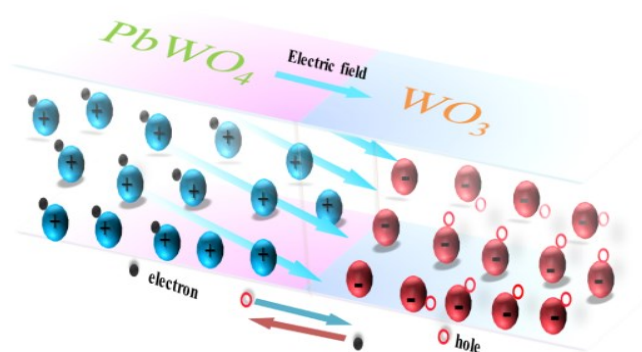

20

21 **Fig. S3** The internal electric field

22 When semiconductors with different work function combined into a composite, electrons are  
23 migrated from one semiconductor to another, forming internal electric field (IEF) around the interface,  
24 which becomes the driving force of photogenerated carrier migration<sup>[8]</sup>. Recently, IEF engineering has  
25 emerged as an efficient method to improve photogenerated charge separation<sup>[9-11]</sup>. Scholars have found  
26 that interface interaction can enhance IEF<sup>[12-14]</sup>. Many composite photocatalysts have been  
27 demonstrated to construct IEF at heterogeneous interface. Such as,  $\text{g-C}_3\text{N}_4/\text{Bi}_2\text{WO}_6$ <sup>[15]</sup>,  
28  $\text{CdS}/\text{BiOI}/\text{WO}_3$ <sup>[16]</sup>,  $\text{WO}_3/\text{g-C}_3\text{N}_4$ <sup>[17]</sup>,  $\text{CdS}/\text{WO}_3$ <sup>[1]</sup>,  $\text{Bi}_2\text{WO}_6/\text{BiOI}$ <sup>[18]</sup>. Therefore, when  $\text{WO}_3$  and  $\text{PbWO}_4$   
29 are combined, IEF will be built due to different work function.  $\text{WO}_3$  and  $\text{PbWO}_4$  are both n-type  
30 semiconductor, the Fermi level of them is located near the CB of them. Based on the CB position

31 results of this work, it suggests the work function of  $\text{WO}_3$  is higher than  $\text{PbWO}_4$ <sup>[19, 20]</sup>. The  
 32 establishment process of the built-in electric field is described in Fig. S2. When  $\text{PbWO}_4$  contacts with  
 33  $\text{WO}_3$ , electrons of  $\text{PbWO}_4$  could transfer to  $\text{WO}_3$  until reaching equilibrium, then band bending at grain  
 34 boundary is established, and an IEF with  $\text{PbWO}_4$  pointing to  $\text{WO}_3$  is formed (Fig. S2b). Under light  
 35 irradiation, IEF drives the photogenerated holes of  $\text{PbWO}_4$  to move toward  $\text{WO}_3$ , while the  
 36 photogenerated electrons of  $\text{WO}_3$  move in the opposite direction, thus photogenerated carriers of  $\text{WO}_3$   
 37 and  $\text{PbWO}_4$  are separated according to the Z-type system (Fig. S2c).

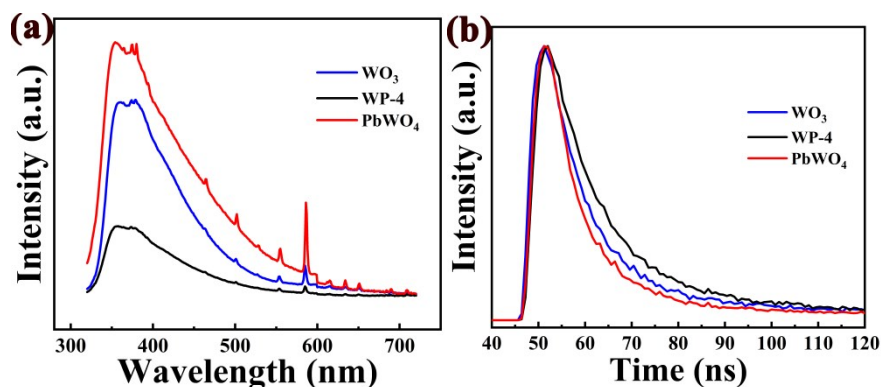

38

39

**Fig. S4** (a) Steady-state PL spectra, (b) time-resolved transient PL decay

40

of  $\text{WO}_3$ ,  $\text{PbWO}_4$  and WP-4

41 The steady-state photoluminescence (PL) spectrum reveals the carrier separation and transfers  
 42 efficiency of the composites, as shown in Fig. S4a. It displays that the PL peak intensity of WP-4 is  
 43 lower than  $\text{WO}_3$  and  $\text{PbWO}_4$ , indicating that the recombination of photogenerated electron-hole pairs  
 44 in WP-4 is forcefully suppressed due to the rapid separation of charge carrier across grain boundary.  
 45 Moreover, the time-resolved photoluminescence spectroscopy (TRPL) is employed to elaborate on the  
 46 specific charge carrier dynamics of  $\text{WO}_3$ ,  $\text{PbWO}_4$  and WP-4 (Fig.S4b). The fluorescent lifetime of PW-  
 47 4 (10.3 ns) is larger than  $\text{WO}_3$  (7.7 ns) and  $\text{PbWO}_4$  (8.8 ns), indicating the photogenerated carriers of  
 48 PW-4 need more times to decay than  $\text{WO}_3$  and  $\text{PbWO}_4$  after stopping illumination, which increases the  
 49 possibility of photocarriers to participate in photo-oxidation reaction<sup>[21]</sup>.

50

51

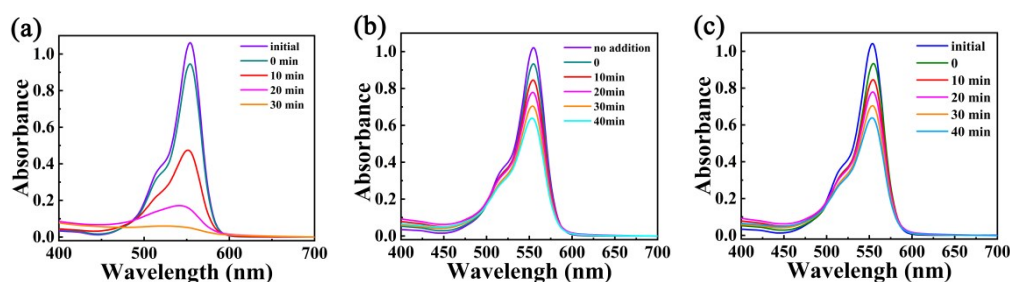

**Fig. S5** UV-Vis absorption spectrum of PW-4 (a), UM (b), and PC (c)

52

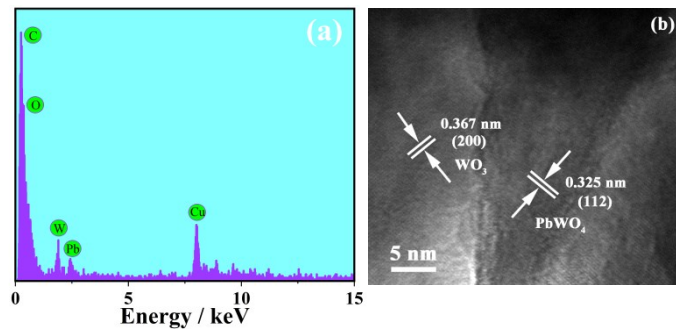

53

54

**Fig. S6** (a) EDX spectra and (b) TEM with definite phase interface of the PC

55

56

57

58

59

60

61

62

According to the mass ratio of the WP-4, PbWO<sub>4</sub>/WO<sub>3</sub> composite with interface is obtained according to He, Hongcai's<sup>[22]</sup> research. The EDX spectra and high-resolution TEM image of the physically contacted WO<sub>3</sub>/PbWO<sub>4</sub> composite (PC) are measured to further prove that the combination of two similar crystal units can form a high-quality contact interface (Fig. S6 (a, b)). From Fig. S6b, a clear interface is observed, which is different from the TEM result of grain boundary with continuous phase transition. Due to PW-4 is connected by the same crystal structure unit, strong interaction exists between WO<sub>3</sub> and PbWO<sub>4</sub>, and no gap between these two parts. As result, it is easier for photocarriers to transmit and separate in two parts.

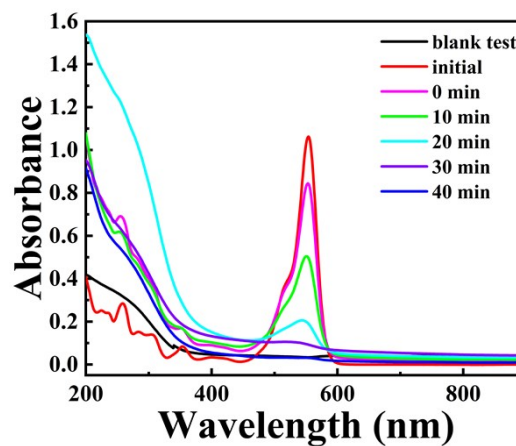

63

64

**Fig. S7** UV-Vis absorption spectrum of PW-4

65

66

67

68

69

70

According to the UV-vis absorption spectra of RhB at different degradation time and the blank experiment (same condition but without RhB), as shown in Fig. S7. The slight blue shift of RhB maximum absorption wavelength is attributed to the N-deethylation of RhB. The main absorption peak disappears after 40 min, indicating the RhB molecule was thoroughly cracked. Carefully, the peaks below 400 nm disappear after 20 min, suggesting small aromatic ring compounds gradually disappear. The blank experiment result (the range of 300 nm - 200 nm), indicating the baseline will be raised

71 when using photocatalyst, which may be due to the small particles contained in centrifugal supernatant.  
72 The same phenomenon is also observed in the photocatalytic degradation experiment of RhB over PW-  
73 4. But the baseline is a little higher than a blank experiment, which may be due to some kinds of small  
74 molecules exist<sup>[23-26]</sup>. However, most RhB will be mineralized over PW-4 under illumination.  
75

76 **References**

- 77 [1] L. J. Zhang, S. Li, B. K. Liu, D. J. Wang and T. F. Xie, *ACS Catal*, 2014, **4**, 3724-3729.
- 78 [2] S. Q. Zhang, T. Yu, H. Wen, R. Guo, J. J. Xu, R. X. Zhong, X. Li and J. H. You, *RSC Adv.*, 2020,  
79 **10**, 16892-16903.
- 80 [3] G. Li, J. J. Hou, W. L. Zhang, P. W. Li, G. H. Liu, Y. G. Wang and K. Y. Wang, *Mater. Chem.*  
81 *Phys.*, 2020, **246**, 122827-122835.
- 82 [4] Chen D, Ye J. Hierarchical WO<sub>3</sub>Hollow Shells: Dendrite, Sphere, Dumbbell, and Their  
83 Photocatalytic Properties [J]. *Advanced Functional Materials*, 2008, **18**, 1922-1928.
- 84 [5] Z. F. Zhu, Y. Yan and J. Q. Li, *Micro & Nano Letters*, 2015, **10**, 460-464.
- 85 [6] D. Yue, W. Lu, M. N. Wang, X. L. Zhang, Z. L. Wang and G. D. Qian. *Rsc Adv.*, 2016, **6**, 81447–  
86 81453.
- 87 [7] R. Saraf, C. Shivakumara, S. Behera, H. Nagabhushana and N. Dhananjaya, *S.A.P:M&B.S*, 2015,  
88 **136**, 348-355.
- 89 [8] Y. Guo, W. X. Shi and Y. F. Zhu, *EcoMat*, 2019, **1**, 12007-12026.
- 90 [9] Y. Chen, W. Y. Yang, S. Gao, L. J. Zhu, C. X. Sun and Q. Li, *ChemSusChem*, 2018, **11**, 1521-  
91 1532.
- 92 [10] N. Esser and W. G. Schmidt, *Phys. Status. Solidi. B*, 2019, **256**, 1800314-1800319.
- 93 [11] J. Li, L. J. Cai, J. Shang, Y. Yu and L. Z. Zhang, *Adv. mater.*, 2016, **28**, 4059-4064.
- 94 [12] X. J. Bai, C. P. Sun, S. L. Wu and Y. F. Zhu, *J. Mater. Chem.*, 2015, **3**, 2741-2747.
- 95 [13] G. Z. Zhang, L. Yang, X. J. Wang, Z. Y. Wu, J. Jiang and Yi Luo, *Adv. mater.*, 2018,  
96 **30**, 1801988-1801917.
- 97 [14] X. P. Tao, Y. Y. Gao, S. Y. Wang, X. Y. Wang, Y. Liu, Y. Zhao, F. T. Fan, M. Dupuis, R. G. Li,  
98 and C. Li, *Adv. Energy Mater*, 2019, **9**, 1803951-1803957.
- 99 [15] Y. Y. Wang, W. J. Jiang, W. J. Luo, X. J. Chen and Y. F. Zhu, *Appl. Catal. B*, 2018, **237**, 633-640.
- 100 [16] Q. Bia, Y. Gao, Z. Q. Wang, C. X. Dang, Z. K. Zhang, L. Wang and J. Q. Xue, *Colloids and Surf.*  
101 *A*, 2020, **599**, 124849-124860.
- 102 [17] J. W. Fu, Q. L. Xu, J. X. Low, C. J. Jiang, J. G. Yu, *Appl. Catal. B*, 2019, **243**, 556-565.
- 103 [18] X. Y. Kong, W. Q. Lee, A. R. Mohamed and S.P. Chai, *Chem. Eng. J.*, 2019, **372**, 1183-1193.
- 104 [19] L. K. Putri, B. J. Ng, W. J. Ong, H. W. Lee, W. S. Chang and S. P. Chai, *J. Mater. Chem. A*, 2018,  
105 **6**, 3181-3194.
- 106 [20] R. Y. Wu, H. B. Song, N. Luo, Y. Sheng and G. J. Ji, *Solid State Sciences*, 2019, **87**, 101-109.
- 107 [21] F. He, G. Chen, Y. G. Yu, S. Hao, Y. S. Zhou and Y. Zheng, *ACS Appl. Mater. Interfaces*, 2014, **6**,  
108 7171–7179.
- 109 [22] Hongcai, Z. L. Jiang, Z. L. He, T. Liu, E. Z. Li and B. W. Li, *Nano. Rese. Letters*, 2018, **13**, 28-34.
- 110 [23] M. Yan, Y. L. Wu, Y. Yan, X. Yan, F. F. Zhu, Y. Q. Hua, and W. D. Shi, *ACS Sustain. Chem.*  
111 *Eng.*, 2016, **4**, 757-766.
- 112 [24] J. Chen, X. Xiao, Y. Wang and Z. Ye, *Appl. Surf. Sci.* 2019, **467-768**, 1000-1010.
- 113 [25] K. Jothivenkatachalam, S. Prabhu, A. Nithya and K. Jeganathan, *RSC Adv*, 2014, **4**, 21221-21229.
- 114 [26] R. Y. Xie, K. J. Fang, Y. Liu, W. C. Chen, J. N. Fan, X. W. Wang, Y. F. Ren and Y. W. Song, *J.*  
115 *Mater. Sci.*, 2020, **55**, 11919-11937.

116

117
